# Supplementary material for: Tuning the strength of intramolecular charge-transfer of triene-based nonlinear optical dyes for electro-optics and optofluidic lasers
Source: Royal Society of Chemistry journal article supplement (doi:10.1039/c7tc00958e), 2017-01-01
Supplement: c7tc00958e1.pdf [file c7tc00958e1.pdf]

Electronic Supporting Information for

# **Tuning the strength of intramolecular charge-transfer of triene-based nonlinear optical dyes for electrooptics and optofluidic laser**

Jieyun Wu,<sup>\*a</sup> Wen Wang,<sup>a</sup> Chaoyang Gong,<sup>a</sup> Qing Li,<sup>a</sup> Zhonghui Li,<sup>\*b</sup> Guowei Deng,<sup>b</sup> Xiaoling Zhang,<sup>b</sup> Kaixin Chen,<sup>a</sup> Yuan Gong,<sup>\*a</sup> and Kin seng Chiang<sup>a,c</sup>

<sup>a</sup>School of communication and information engineering, key Laboratory of Optical Fiber Sensing and Communications, university of electronic science and technology of china, Chengdu, China. \*E-mail: jieyunwu@uestc.edu.cn (J. Wu); ygong@uestc.edu.cn (Y. Gong).

<sup>b</sup>College of Chemistry and Life Science, Institute of Functional Molecules, Chengdu Normal University, Chengdu, China. \*E-mail: zhonghli@sohu.com (Z. Li)

<sup>c</sup>Department of Electronic Engineering, City University of Hong Kong, Hong Kong, China.

1. <sup>1</sup>H NMR and <sup>13</sup>C NMR spectra of dyes 1-4
2. Crystal data of dye 3
3. Thermal gravity analysis of dyes 1-4
4. Fluorescent decay spectra of dyes 1-4

# 1. <sup>1</sup>H NMR and <sup>13</sup>C NMR spectra of dyes 1-4

Dye 1:

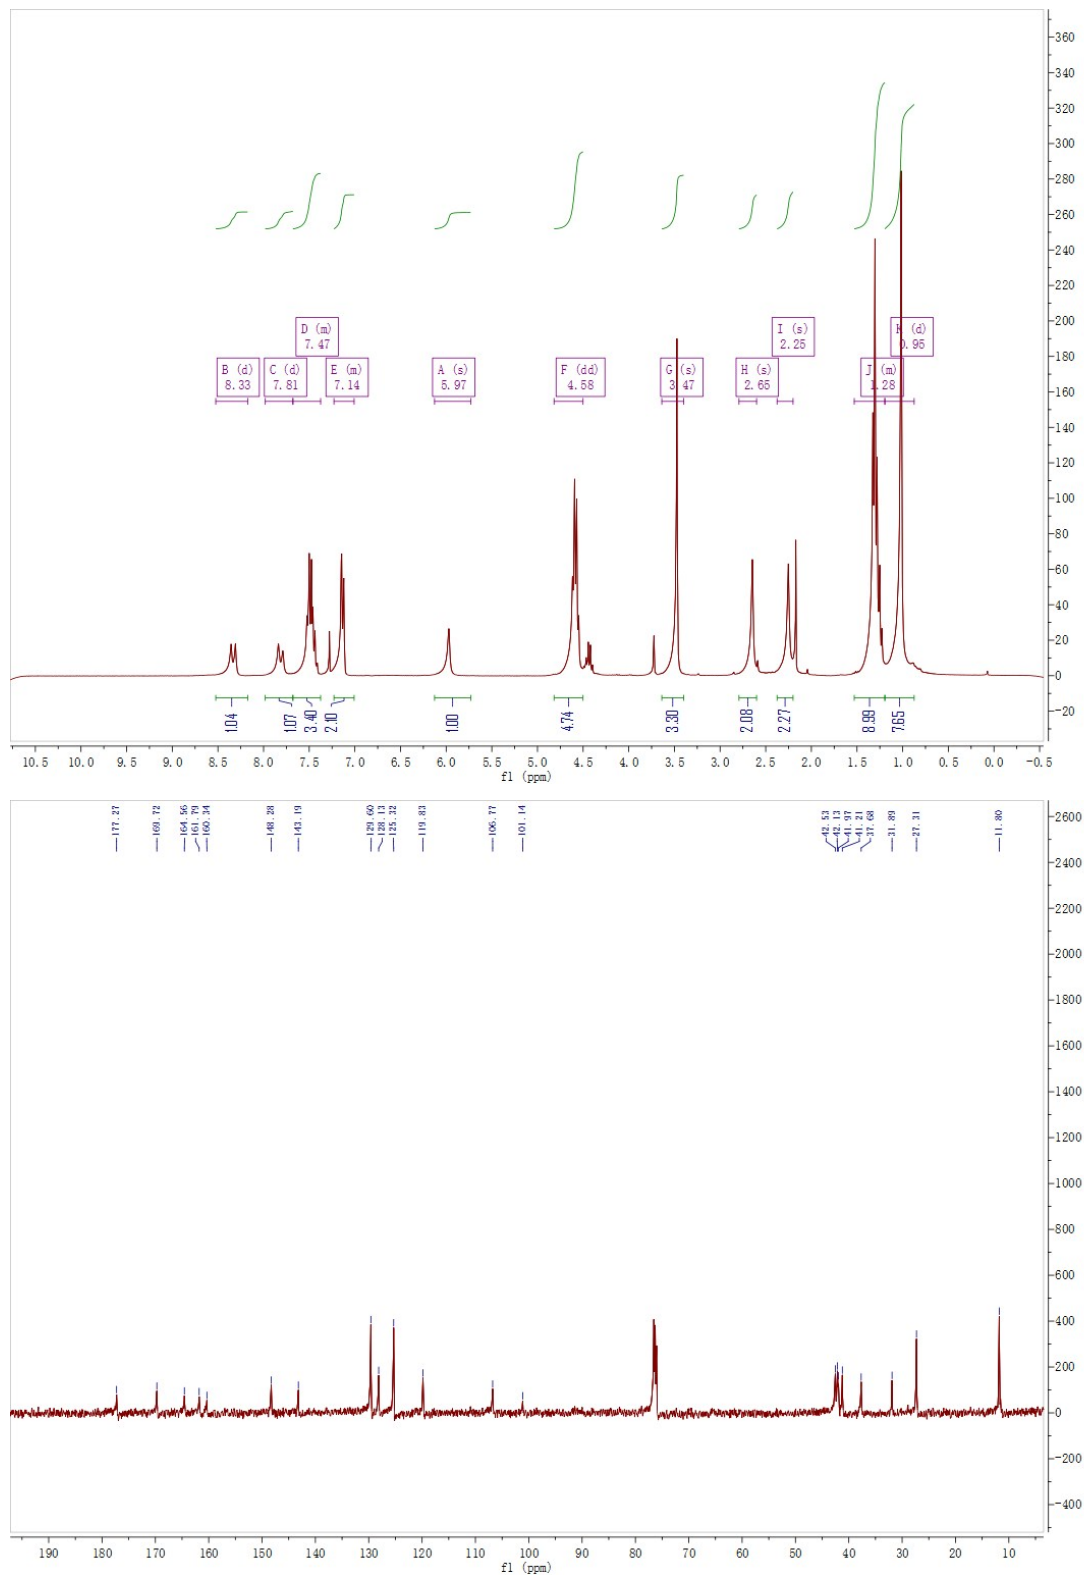

Dye 2:

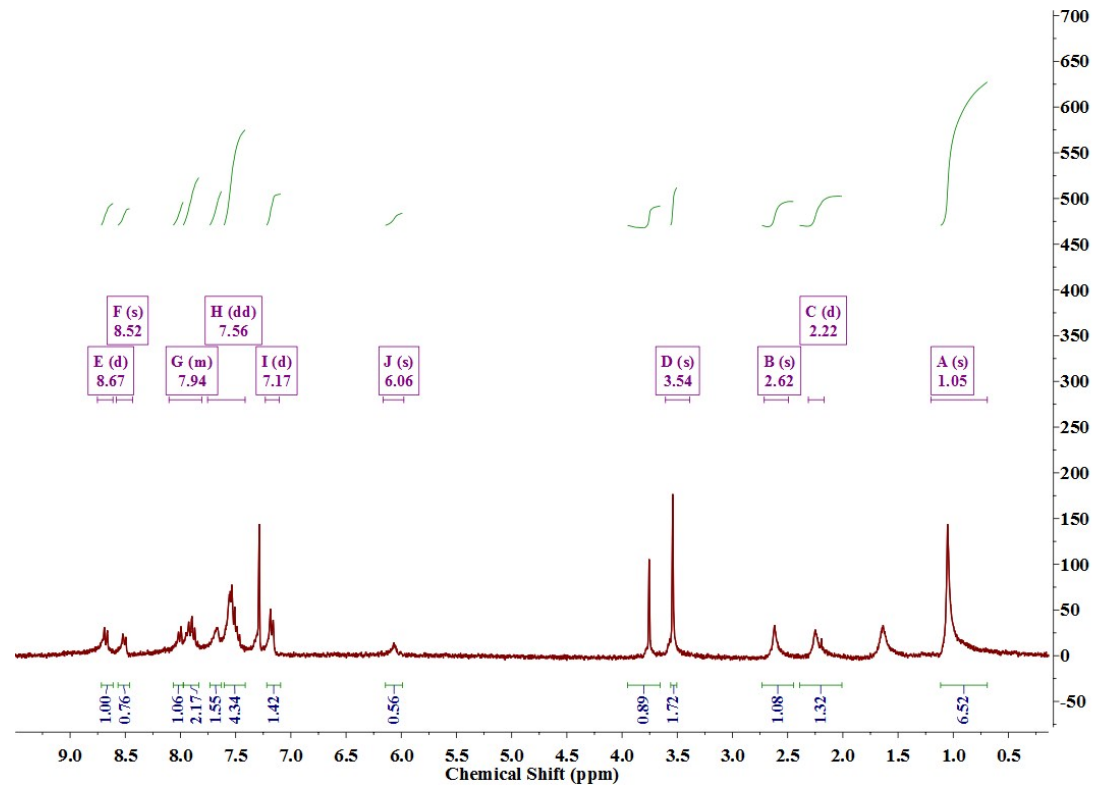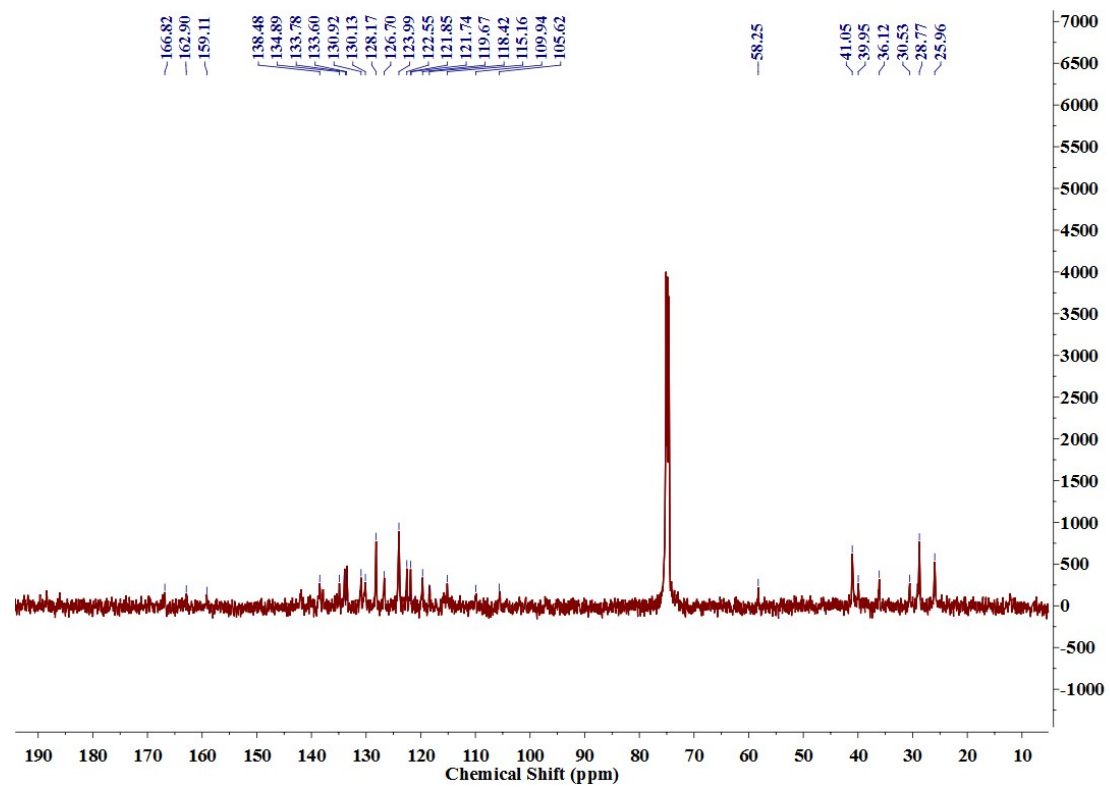

Dye 3:

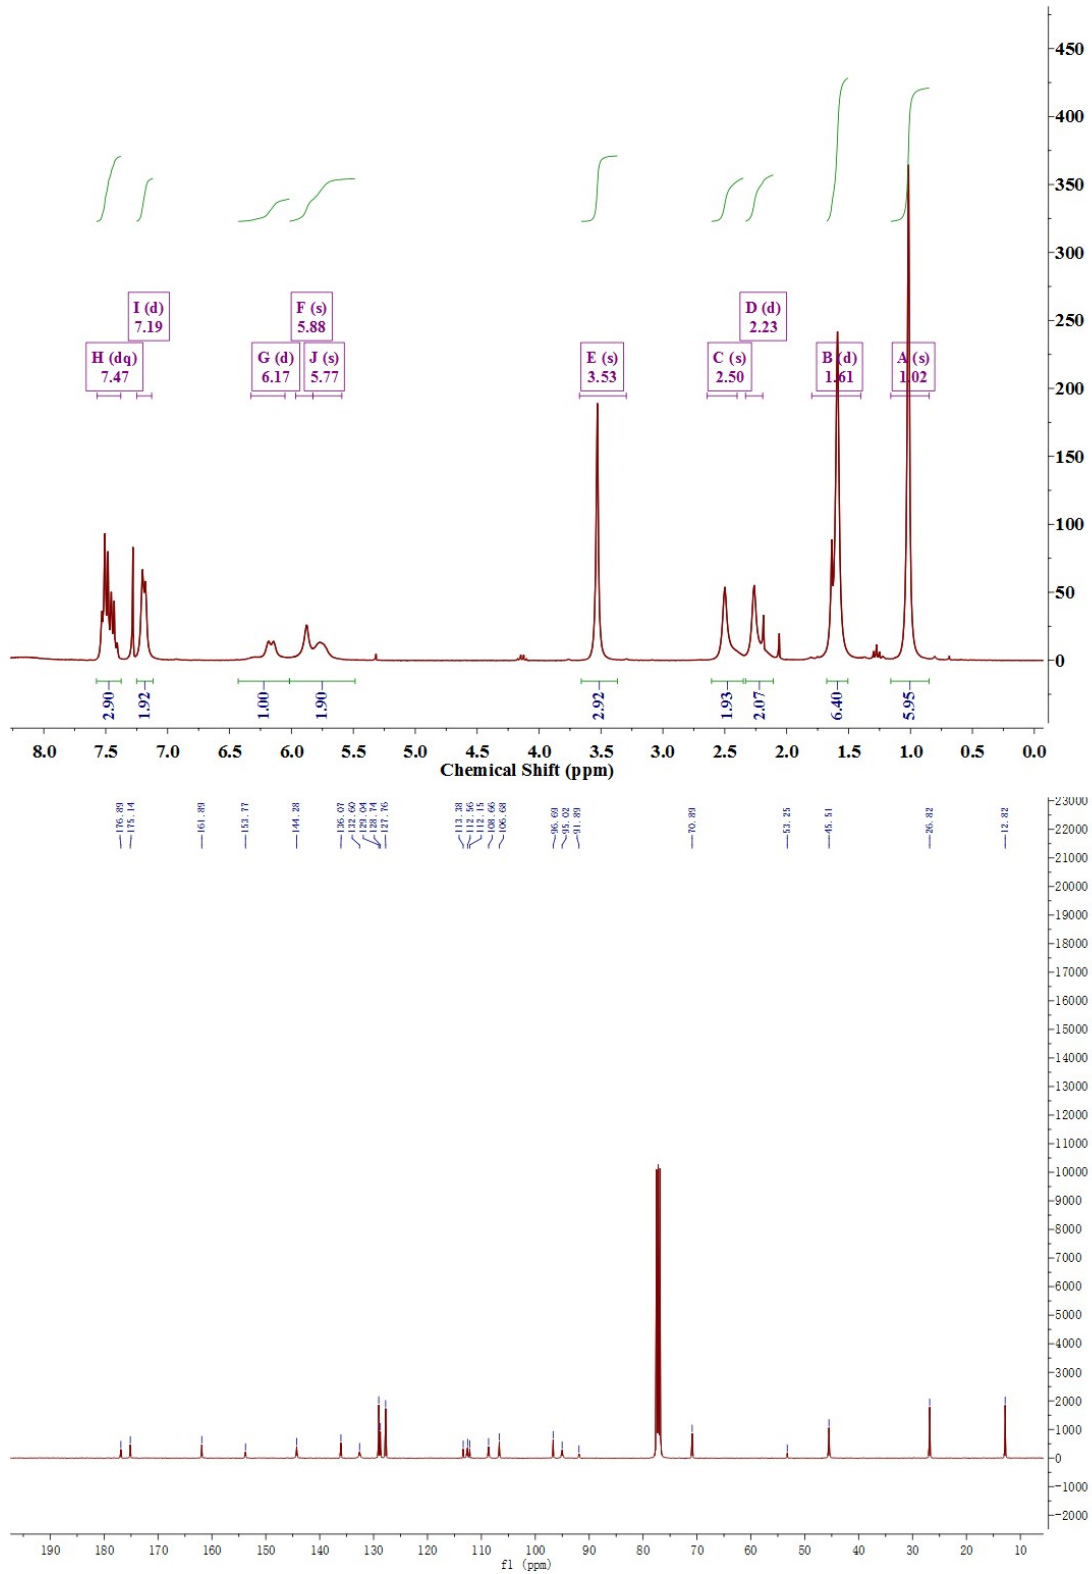

Dye 4:

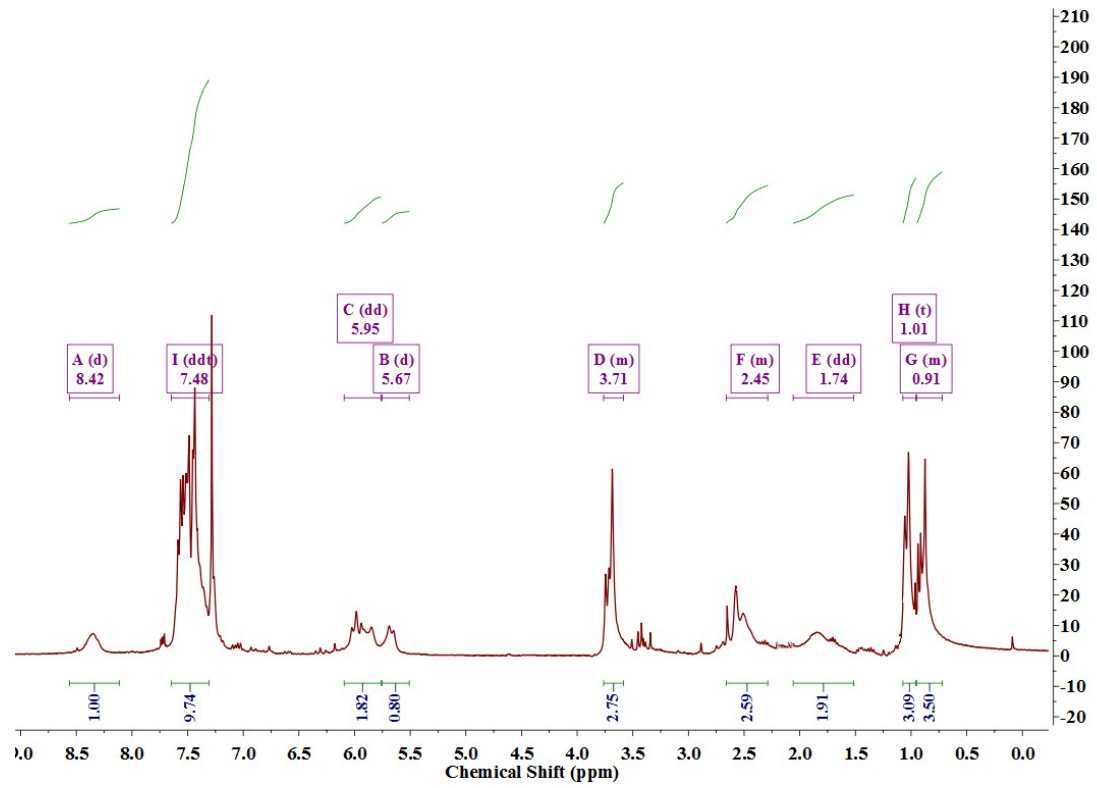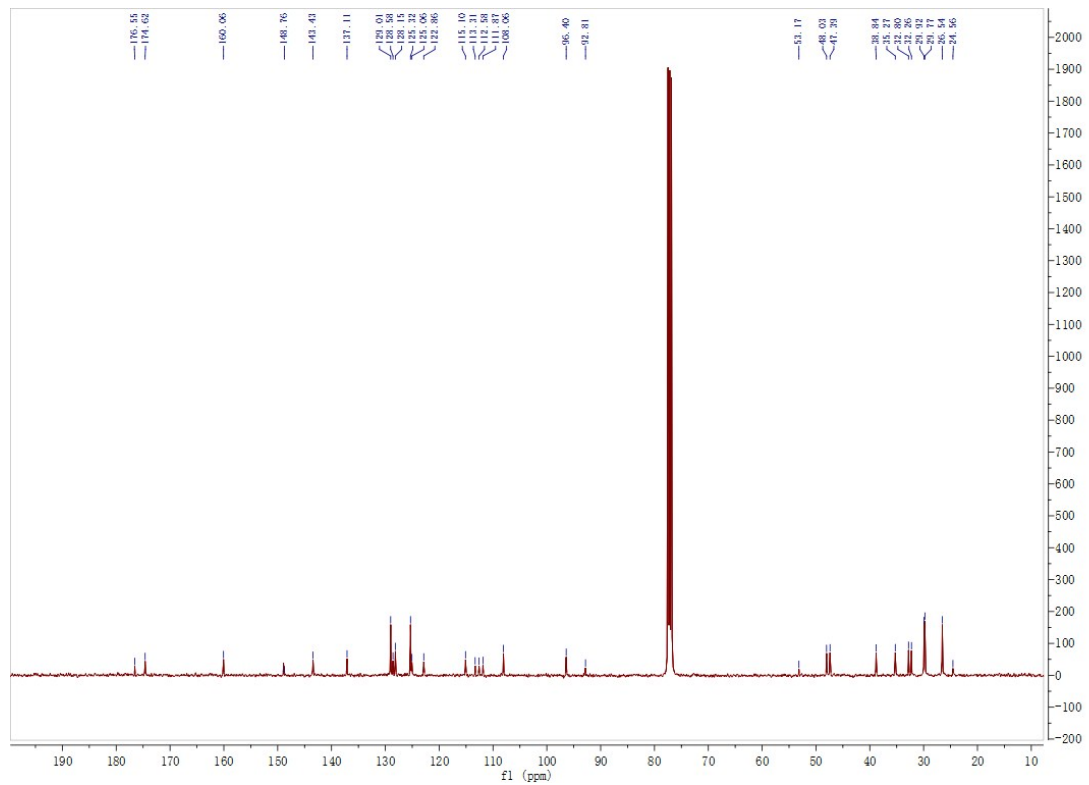

## 2. Crystal data of dye 3

Intensity data of dye 3 (CCDC 1549946) were collected at room temperature on a Bruker PLATFORM diffractometer equipped with a SMART APEX II CCD area detector and a graphite-monochromated Mo  $K\alpha$  radiation source, using  $\omega$  scans at 6 different  $\phi$  angles with a frame width of  $0.3^\circ$  and an exposure time of 25 second per frame. Face-indexed numerical absorption corrections were applied. Structure solution and refinement were carried out with use of the SHELXTL (version 6.12) program package.[1]

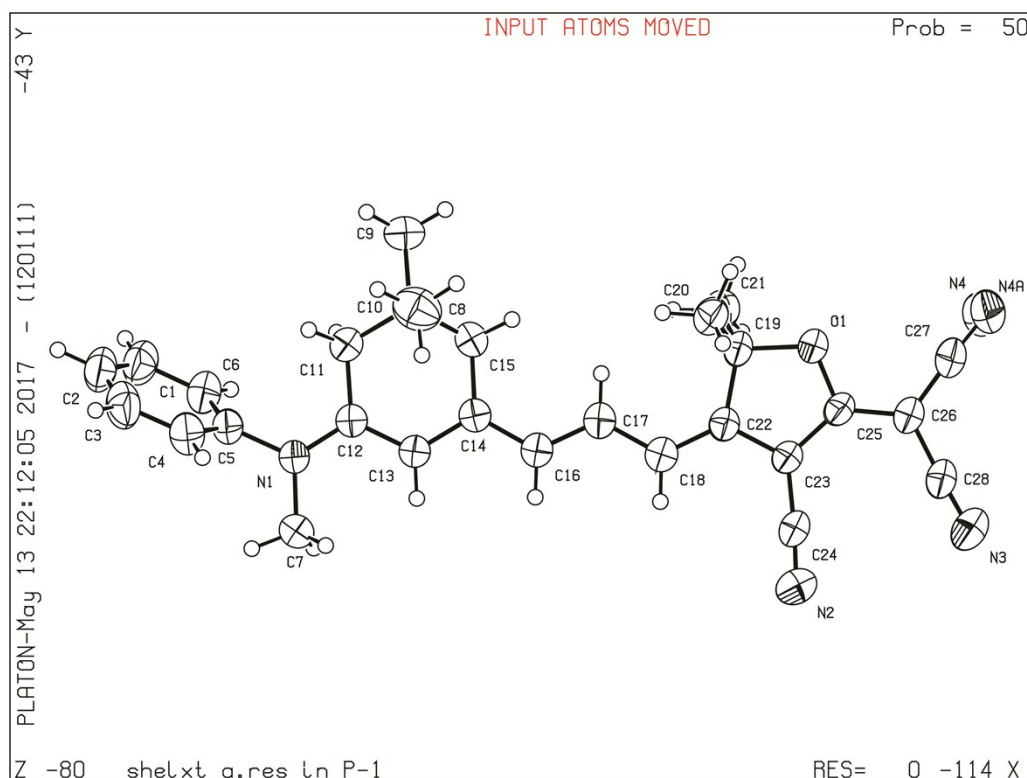

|                    |                                                  |                   |                 |                                                  |
|--------------------|--------------------------------------------------|-------------------|-----------------|--------------------------------------------------|
| Bond precision:    | C-C = 0.0030 Å                                   |                   |                 | Wavelength=0.71073                               |
| Cell:              | a=6.2564(5)                                      | b=11.3834(10)     | c=17.9585(15)   |                                                  |
|                    | alpha=97.453(2)                                  | beta=94.502(2)    | gamma=96.730(2) |                                                  |
| Temperature:       | 296 K                                            |                   |                 |                                                  |
| Data completeness: | 0.998                                            | Theta(max):       | 25.781          |                                                  |
| R(reflections):    | 0.0483( 2800)                                    | wR2(reflections): | 0.1463( 4801)   |                                                  |
| S = 1.012          | N <sub>par</sub> = 307                           |                   |                 |                                                  |
|                    | Calculated                                       |                   |                 | Reported                                         |
| Volume             | 1253.73(18)                                      |                   |                 | 1253.73(18)                                      |
| Space group        | P -1                                             |                   |                 | P -1                                             |
| Hall group         | -P 1                                             |                   |                 | -P 1                                             |
| Moiety formula     | C <sub>28</sub> H <sub>28</sub> N <sub>4</sub> O |                   |                 | C <sub>28</sub> H <sub>28</sub> N <sub>4</sub> O |

|                        |                                                  |                                                  |
|------------------------|--------------------------------------------------|--------------------------------------------------|
| Sum formula            | C <sub>28</sub> H <sub>28</sub> N <sub>4</sub> O | C <sub>28</sub> H <sub>28</sub> N <sub>4</sub> O |
| Mr                     | 436.54                                           | 436.54                                           |
| Dx,g cm <sup>-3</sup>  | 1.156                                            | 1.156                                            |
| Z                      | 2                                                | 2                                                |
| Mu (mm <sup>-1</sup> ) | 0.072                                            | 0.072                                            |
| F000                   | 464.0                                            | 464.0                                            |
| F000'                  | 464.16                                           |                                                  |
| h,k,l <sub>max</sub>   | 7,13,21                                          | 7,13,21                                          |
| N <sub>ref</sub>       | 4813                                             | 4801                                             |

### 3. Thermal gravity analysis of dyes 1-4

The TGA was determined by TA5000-2950TGA (TA co) with a heating rate of 10 °C min<sup>-1</sup> under the N<sub>2</sub> atmosphere.

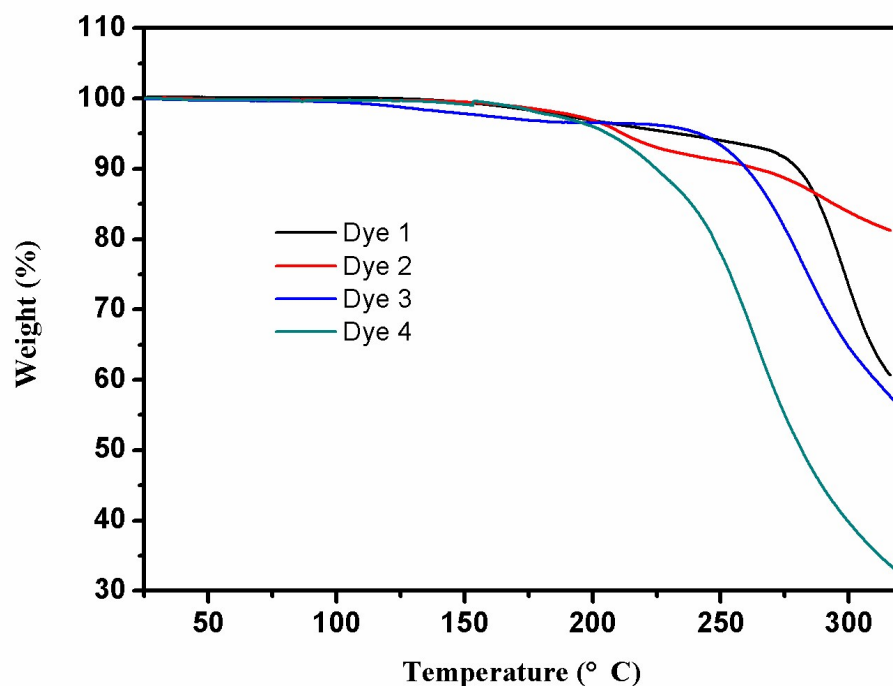

### 4. Fluorescent decay spectra of dyes 1-4

Fluorescence lifetime was measured on a Fluorolog-3 spectrofluorometer (Horiba JobinYvon) with a Delta Diode (505 nm, D-505, Horiba Scientific; 635 nm, D-635, Horiba Scientific) as the excitation source and a picosecond photon detection module (PPD-850, Horiba Scientific) as the detector. The excited wavelengths are 505 nm dye 1 and 635 nm for dyes 2-4.

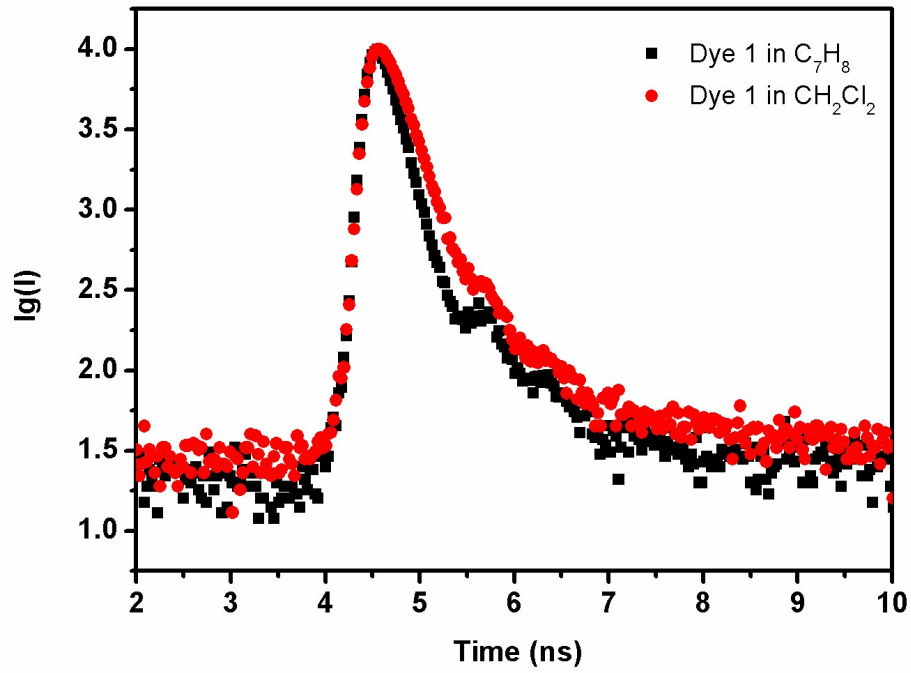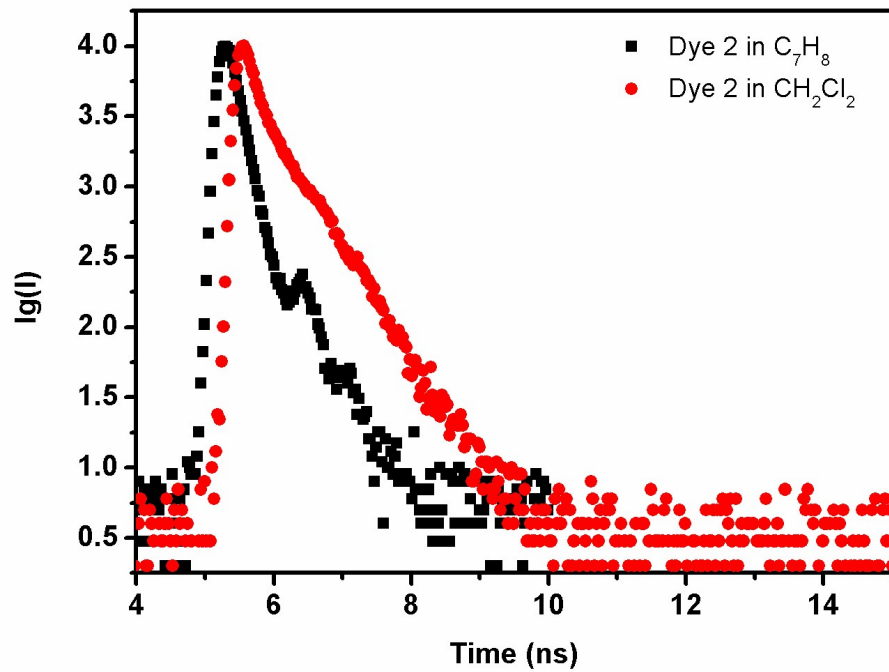



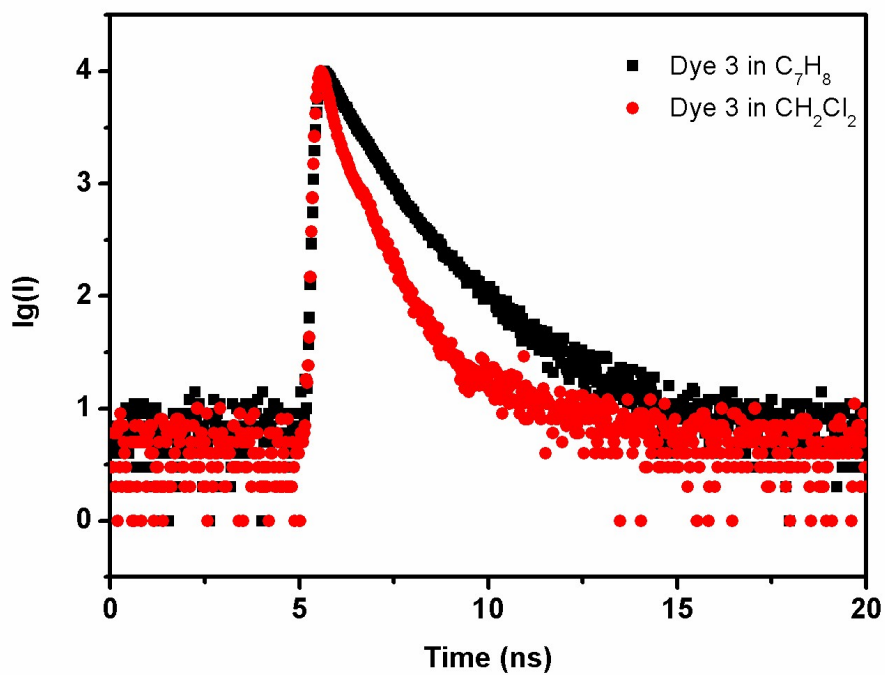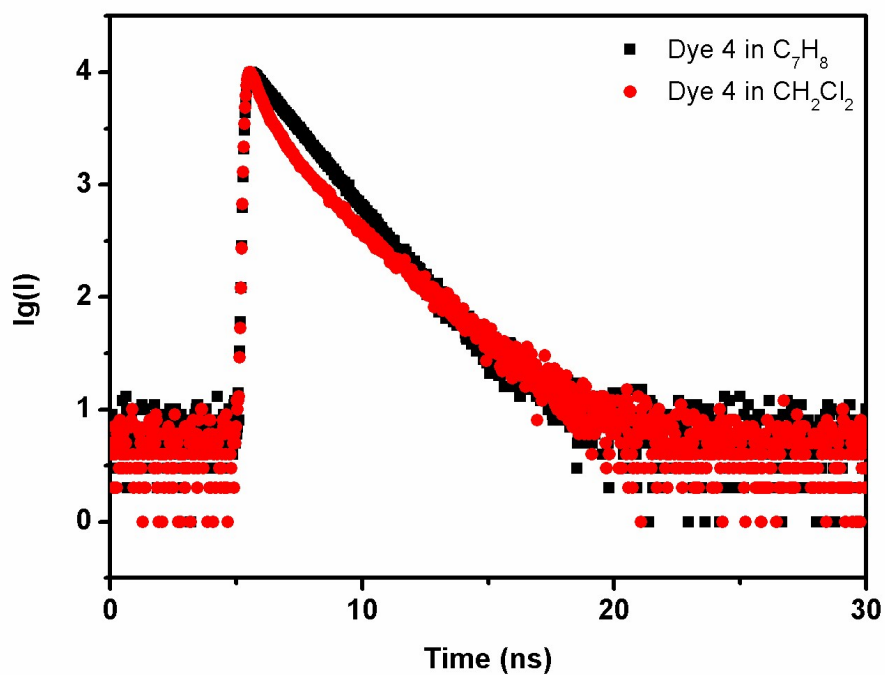

[1]. G.M. Sheldrick, SHELXTL, Version 6.12, Bruker AXS Inc., Madison, WI, 2001.
